# Supplementary material for: Stylistic Composition of Melodies Based on a Brain-Inspired Spiking Neural Network
Source: Frontiers journal article supplement (doi:10.3389/fnsys.2021.639484), 2021-03-11
Supplement: Data_Sheet_1.pdf [file Data_Sheet_1.pdf]

# Supplementary Material: Stylistic composition of melodies based on a brain-inspired spiking neural network

## 1 SUPPLEMENTARY DATA

We proposed a spiking neural network inspired by brain mechanisms to create musical melodies with different styles. As is shown in Fig.S1, the training set is a collection of MIDI files, which record classical piano works from different musicians. After the learning process, the model can generate melodies and store them as MIDI files. To better understand the melodies generated by our model, we list 20 generated samples picked randomly in our testset which are shown in Fig.S2.

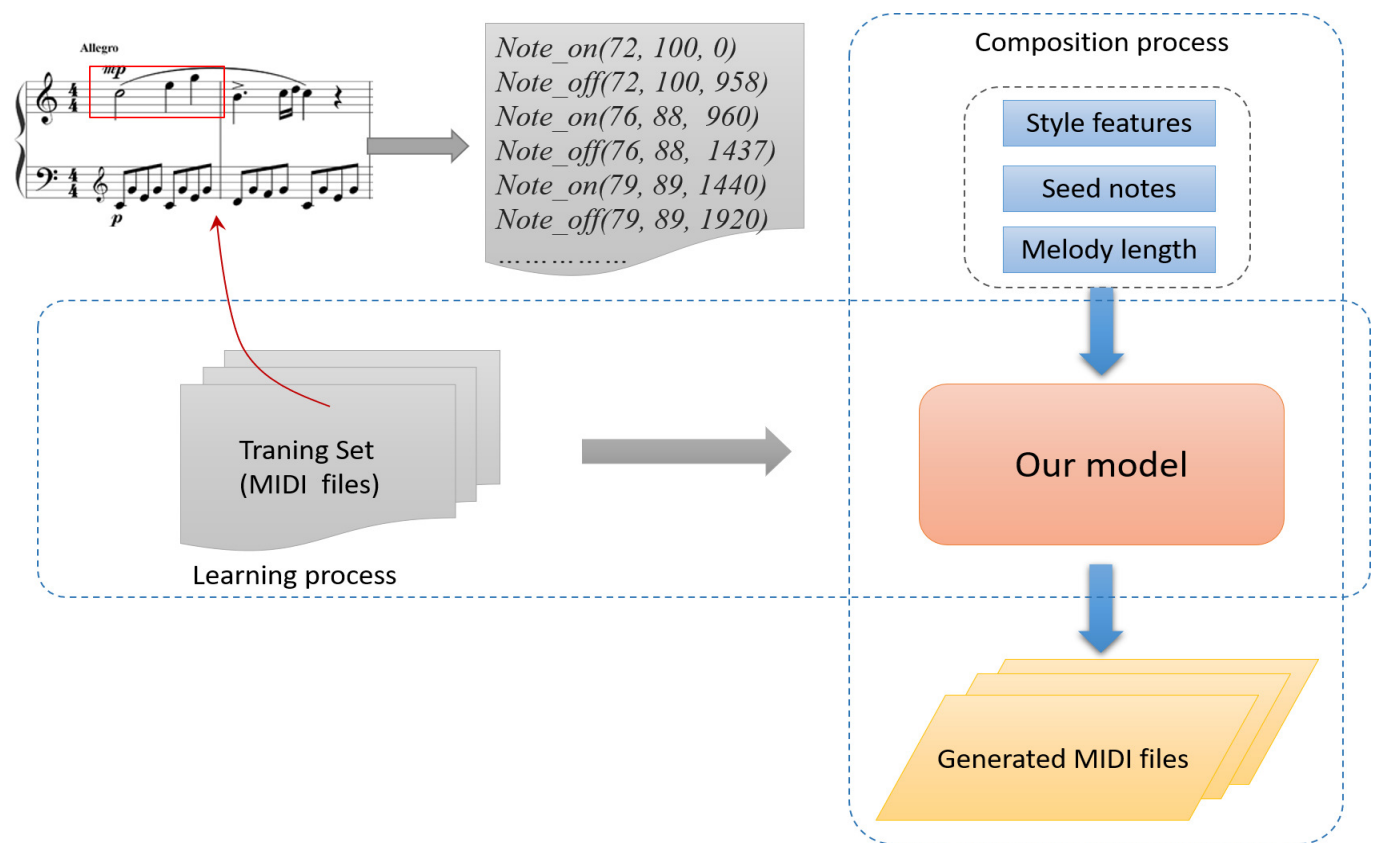

**Figure S1.** The training set is composed of numerous MIDI files, all the musical information is stored as MIDI events. The model learns these MIDI files and generated melodies which are also written by MIDI files.

The musical score for 'The Rose Tree' is presented in two systems. The first system consists of two staves: a treble staff and a bass staff. The treble staff begins with a treble clef, a key signature of one flat (B-flat), and a 4/4 time signature. The bass staff begins with a bass clef and the same key signature and time signature. The melody is primarily in the treble staff, featuring a series of eighth and sixteenth notes, with some rests. The bass staff provides a simple harmonic accompaniment with eighth notes. The second system also consists of two staves. The treble staff continues the melody, ending with a double bar line. The bass staff continues the accompaniment, also ending with a double bar line. The score is written in a clear, legible font, with standard musical notation including clefs, key signatures, time signatures, and various note values and rests.

The musical score for 'The Rose Tree' is presented in two systems. The first system contains the first line of the melody, and the second system contains the second line. The key signature is one flat (B-flat), and the time signature is 4/4. The melody is written for a single voice part. The first system ends with a repeat sign, and the second system begins with a measure number '12'.

The first staff of music is in 4/4 time with a tempo marking of quarter note = 67. It begins with a whole rest, followed by a quarter note G4, an eighth note F#4, and a quarter note E4. The melody continues with a triplet of eighth notes (D4, C4, B3), followed by a quarter note A3, a quarter note G3, and a quarter note F3. The staff concludes with a triplet of eighth notes (E3, D3, C3) and a final whole rest.

The musical score for 'The Rose Tree' is presented in two systems. The first system consists of a bass staff and a treble staff. The bass staff begins with a treble clef, a key signature of one flat (B-flat), and a 4/4 time signature. It contains a melody with a triplet of eighth notes (G4, A4, B4) and a triplet of eighth notes (D5, C5, B4). The treble staff begins with a bass clef and contains a melody with a triplet of eighth notes (G4, A4, B4) and a triplet of eighth notes (D5, C5, B4). The second system consists of a single treble staff. It begins with a treble clef, a key signature of one flat (B-flat), and a 4/4 time signature. It contains a melody with a triplet of eighth notes (G4, A4, B4) and a triplet of eighth notes (D5, C5, B4). The score is for a single melodic line, likely for a voice or a single instrument.

The musical score for 'The Rose Tree' is written for a single melodic line in G major (one sharp) and 4/4 time. The melody is presented in two systems. The first system contains measures 1 through 5. The second system, starting with a measure number '6' below the staff, contains measures 6 through 8. The melody is characterized by its simplicity and the use of eighth and sixteenth notes, with a final double bar line at the end of measure 8.

(11)

(12)

(13)

$j = 119$

(14)

$j = 119$

(15)

$j = 117$

(16)

(17)

(18)

(19)

(19)

$j = 124$

(20)

**Figure S2.** 20 randomly selected melodies which are generated by our model.
